# Supplementary material for: Reduced expression of E-cadherin correlates with poor prognosis and unfavorable clinicopathological features in gastric carcinoma: a meta-analysis
Source: publisher site journal article supplement (doi:10.18632/aging.205929), 2024-06-12
Supplement: Supplementary file [file aging-v16-205929-supplementary-material-SD1.pdf]

**SUPPLEMENTARY FIGURES**

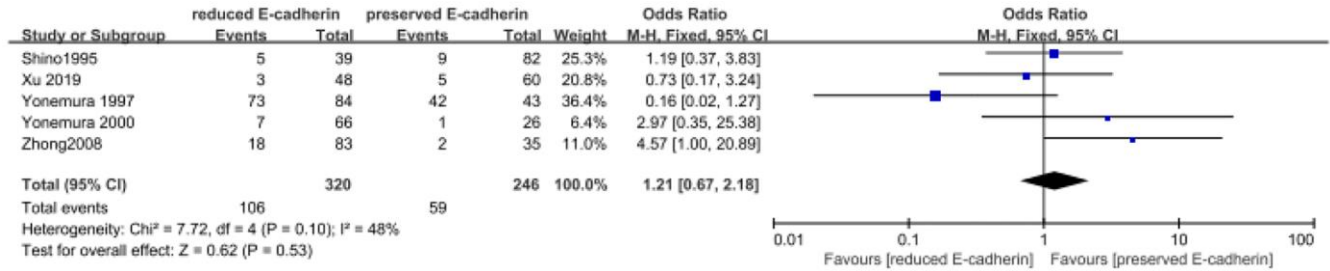

**Supplementary Figure 1. Forest plot of the odds ratio for the correlation of E-cadherin expression with liver metastasis.**

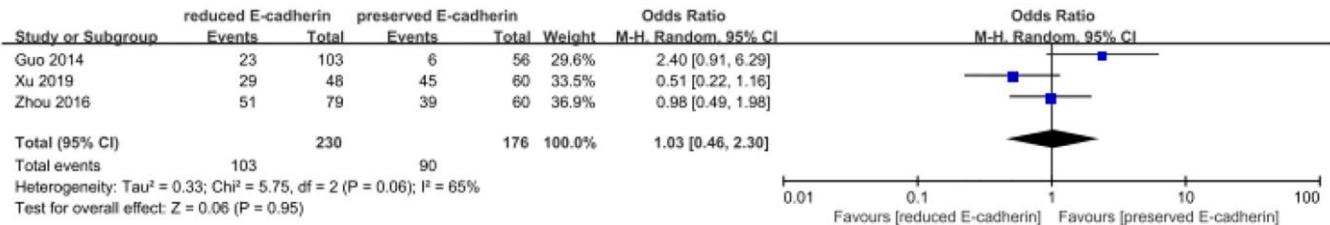

**Supplementary Figure 2. Forest plot of the odds ratio for the correlation of E-cadherin expression with perineural invasion.**

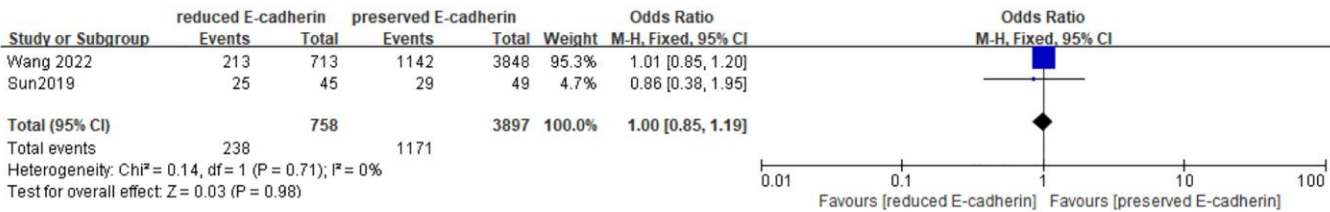

**Supplementary Figure 3. Forest plot of the odds ratio for the correlation of E-cadherin expression with alcohol consumption.**

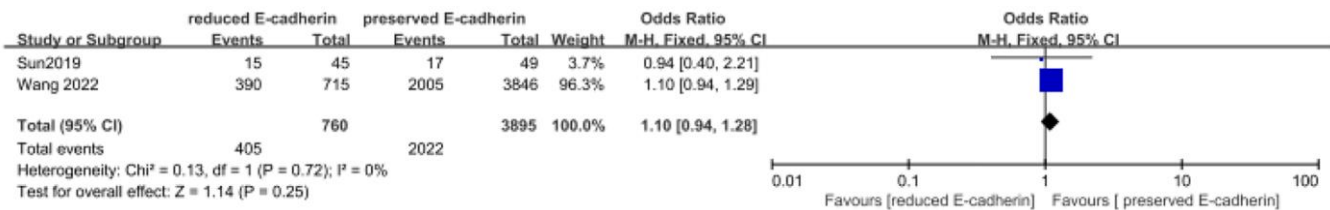

**Supplementary Figure 4. Forest plot of the odds ratio for the correlation of E-cadherin expression with smoking status.**

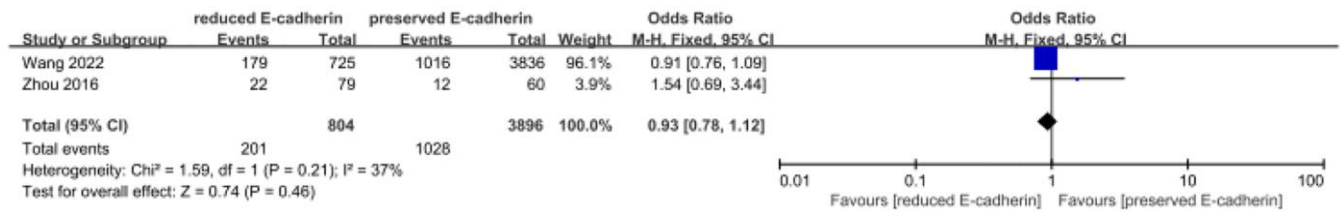

Supplementary Figure 5. Forest plot of the odds ratio for the correlation of E-cadherin expression with familial history.

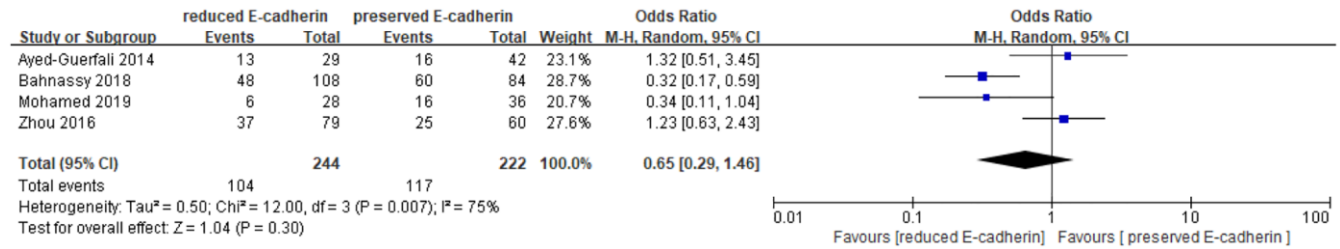

Supplementary Figure 6. Forest plot of the odds ratio for the correlation of E-cadherin expression with HP infection.

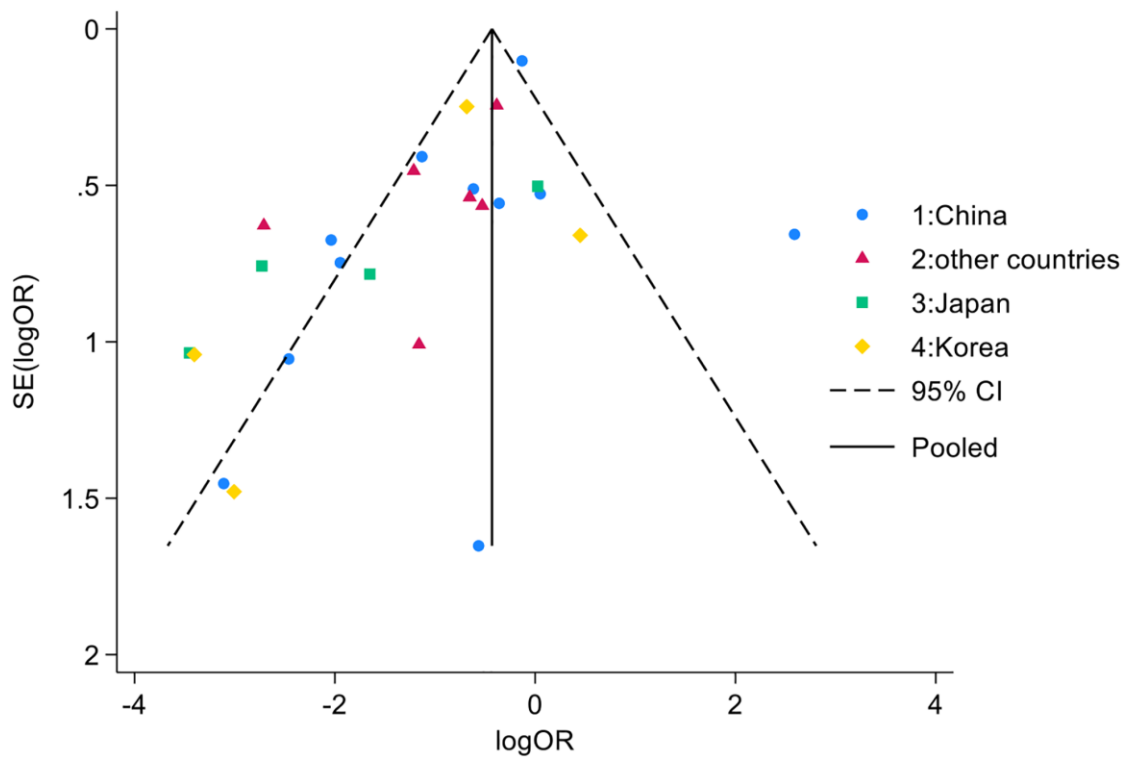

Supplementary Figure 7. Funnel plot of the odds ratio for the correlation of E-cadherin expression with one-year overall survival.

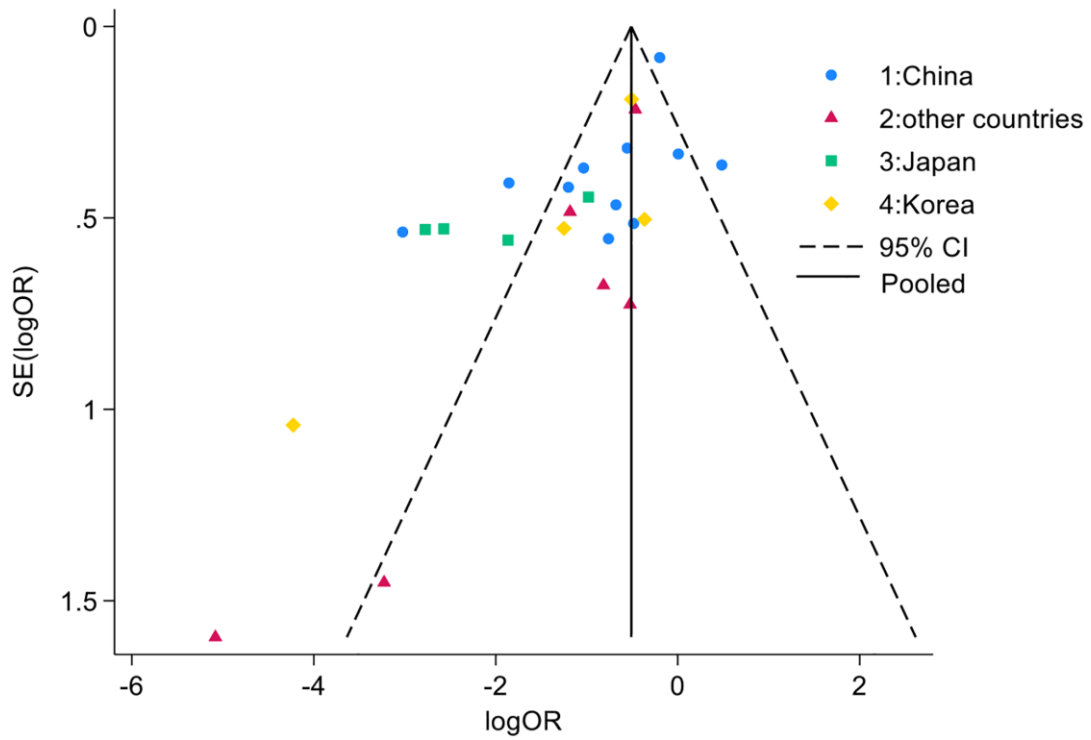

Supplementary Figure 8. Funnel plot of the odds ratio for the correlation of E-cadherin expression with three-year overall survival.

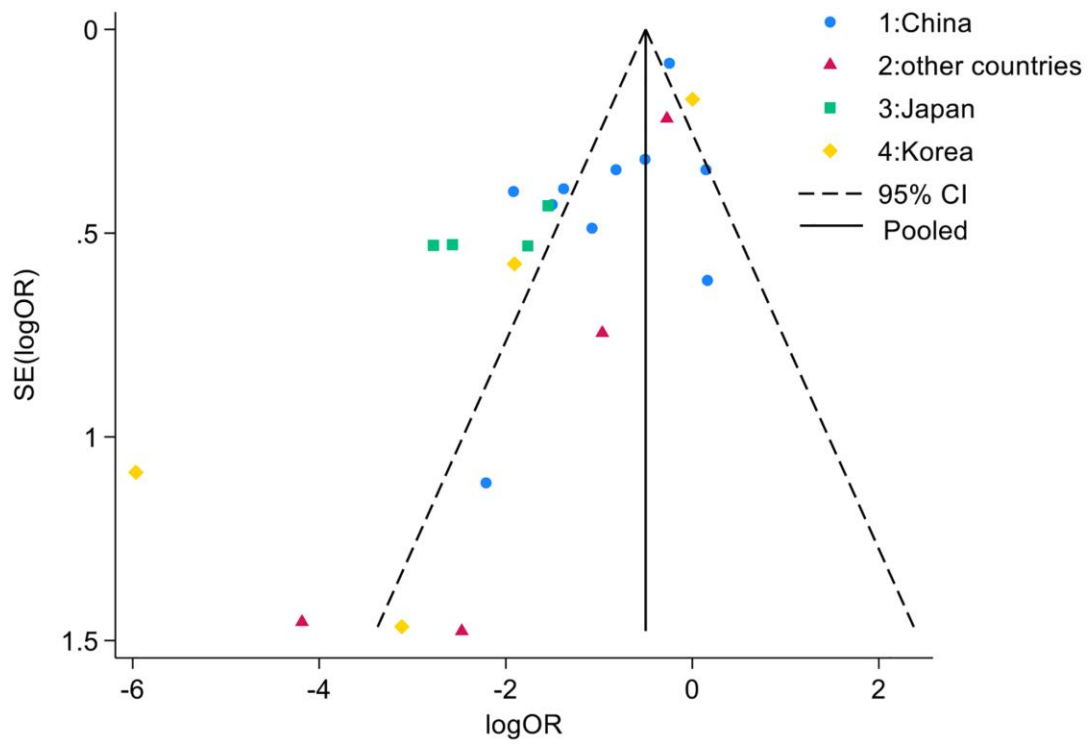

Supplementary Figure 9. Funnel plot of the odds ratio for the correlation of E-cadherin expression with five-year overall survival.

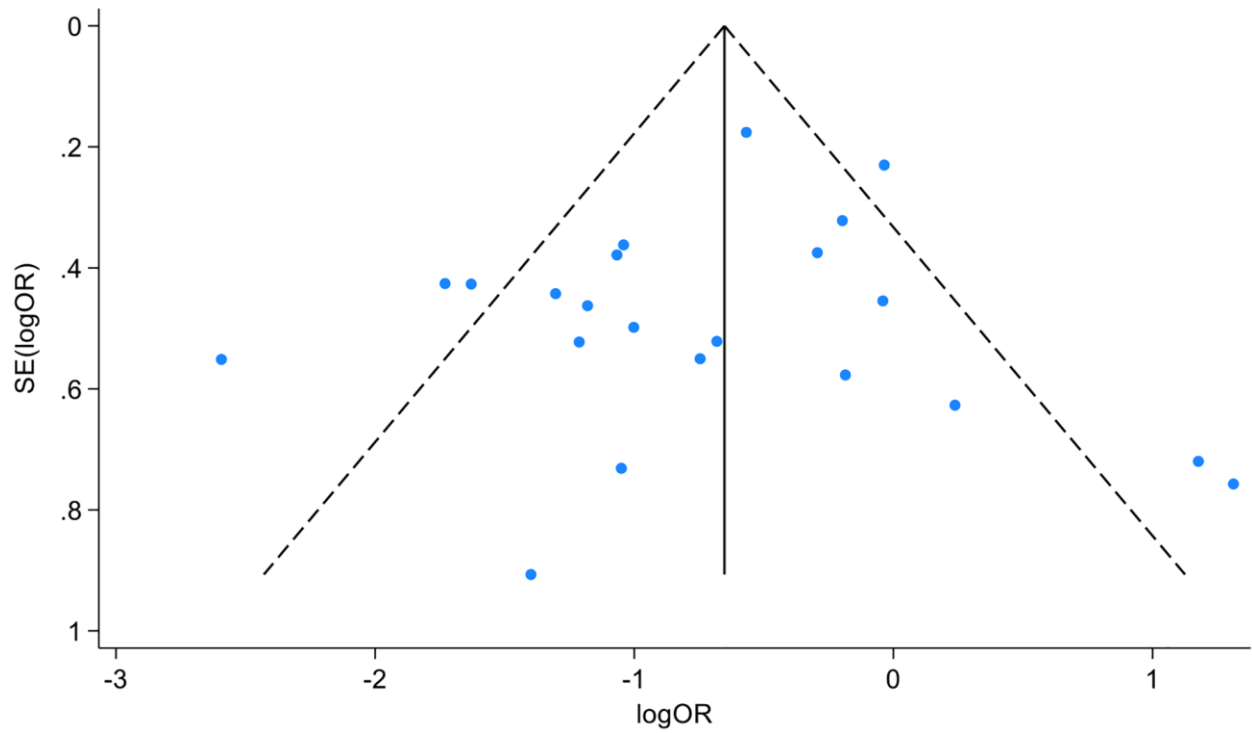

Supplementary Figure 10. Funnel plot of the odds ratio for the correlation of E-cadherin expression with depth of invasion.

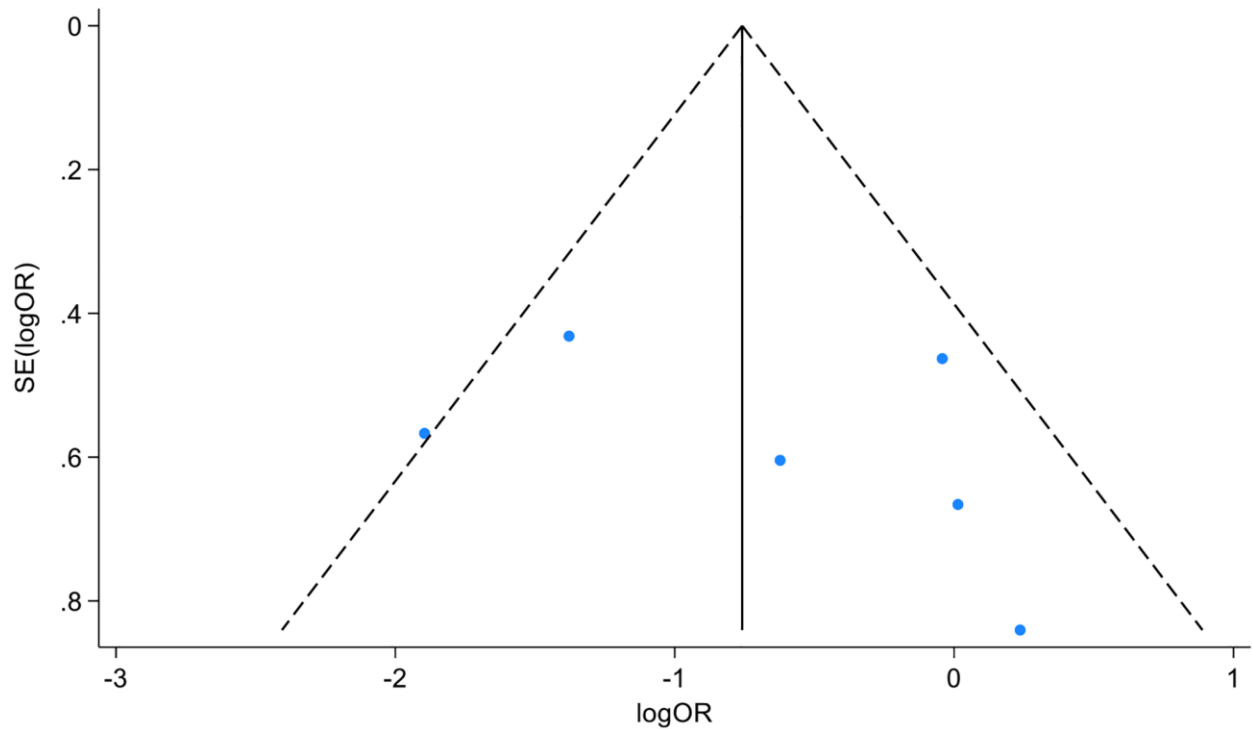

Supplementary Figure 11. Funnel plot of the odds ratio for the correlation of E-cadherin expression with Borrmann classification.

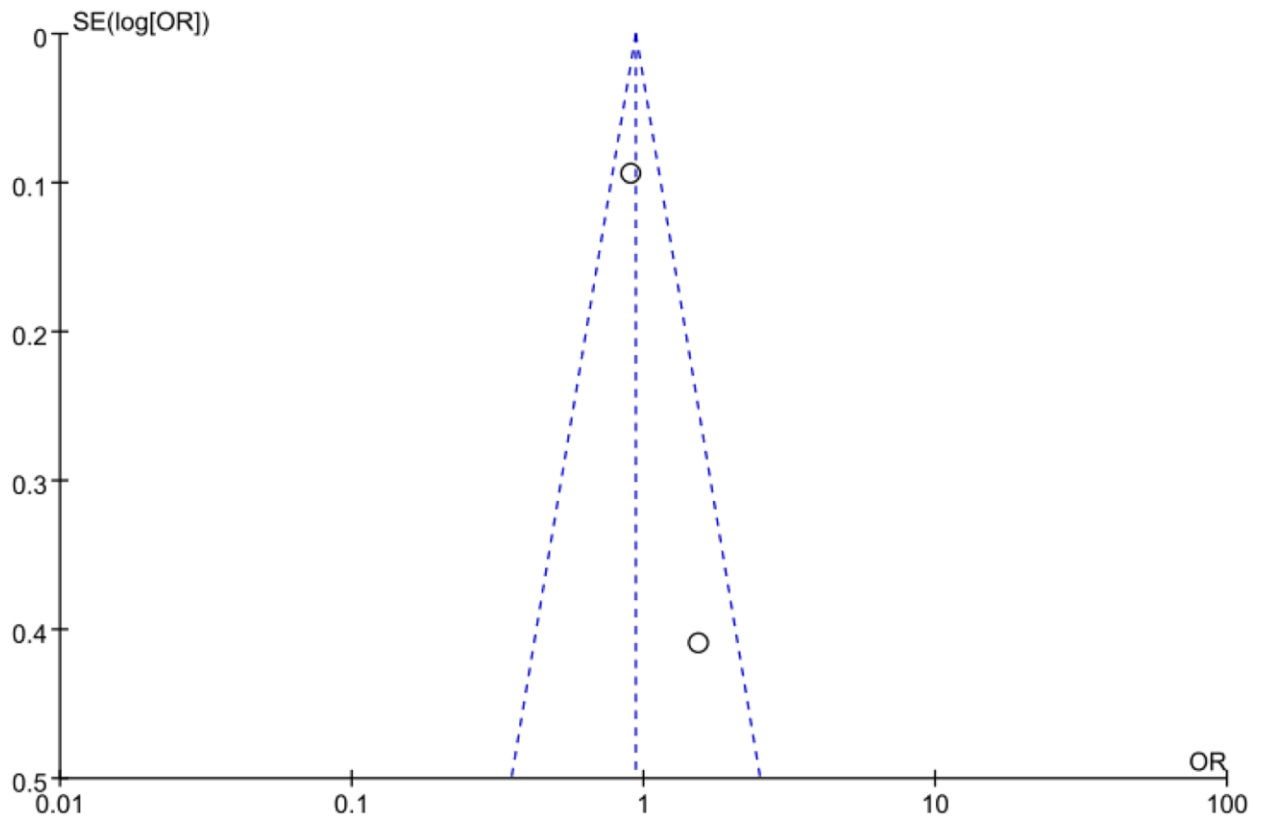

Supplementary Figure 12. Funnel plot of the odds ratio for the correlation of E-cadherin expression with familial history.

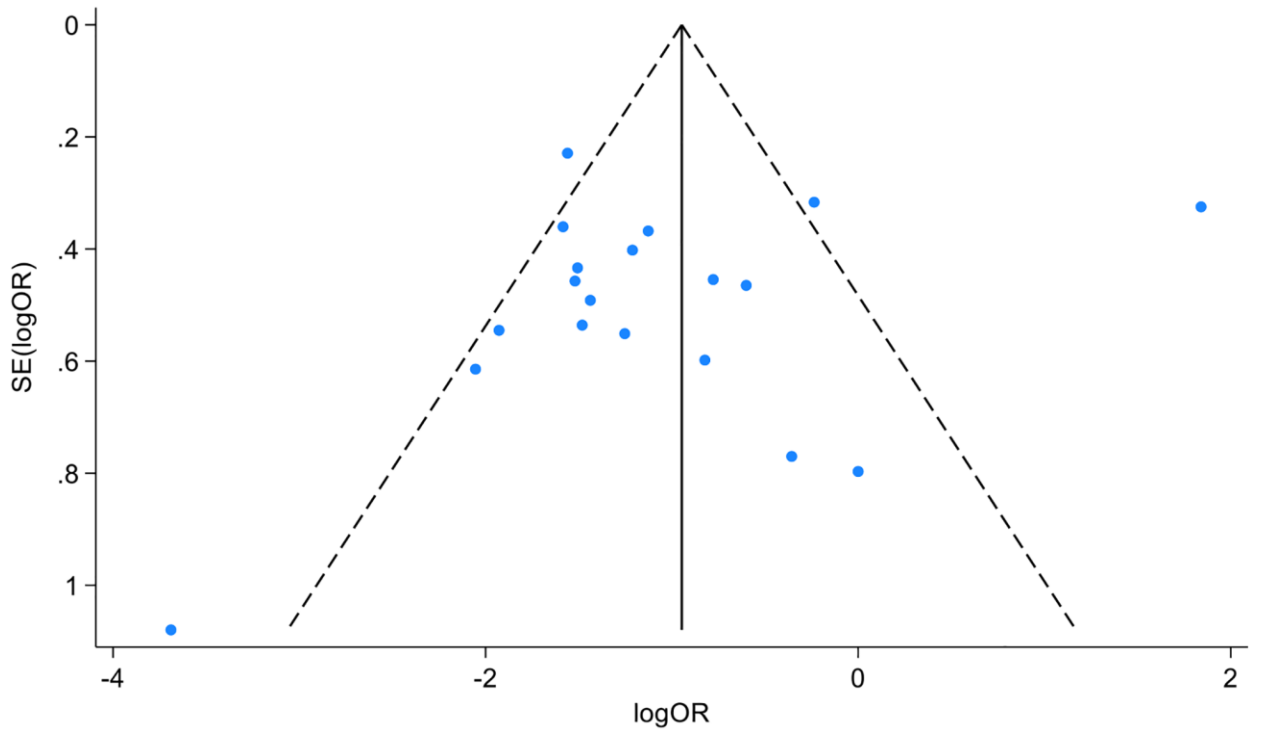

Supplementary Figure 13. Funnel plot of the odds ratio for the correlation of E-cadherin expression with and Lauren type.

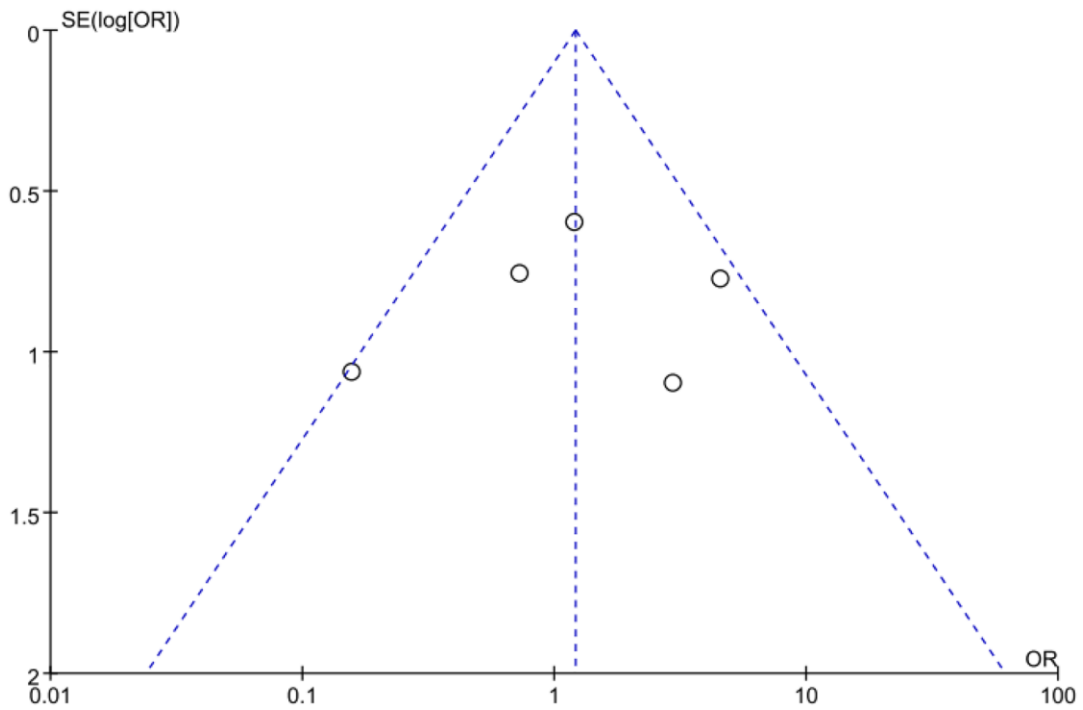

Supplementary Figure 14. Funnel plot of the odds ratio for the correlation of E-cadherin expression with liver metastasis.

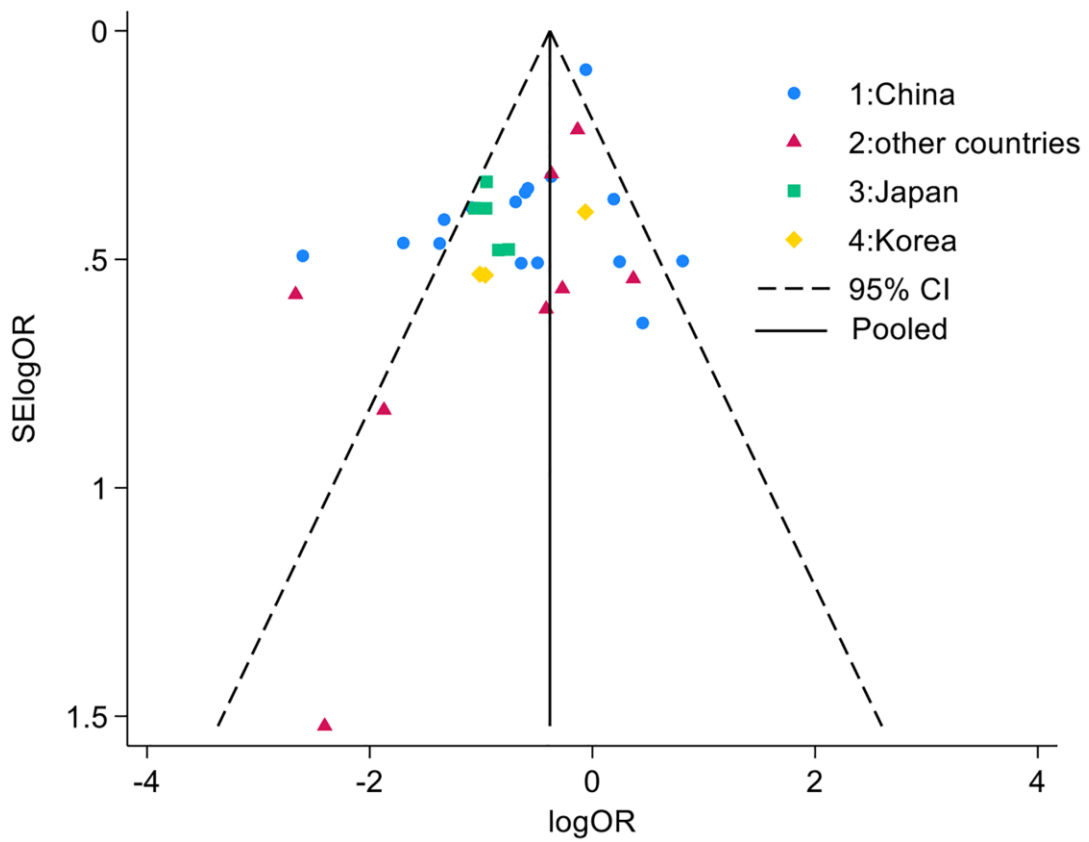

Supplementary Figure 15. Funnel plot of the odds ratio for the correlation of E-cadherin expression with lymphatic node metastasis.

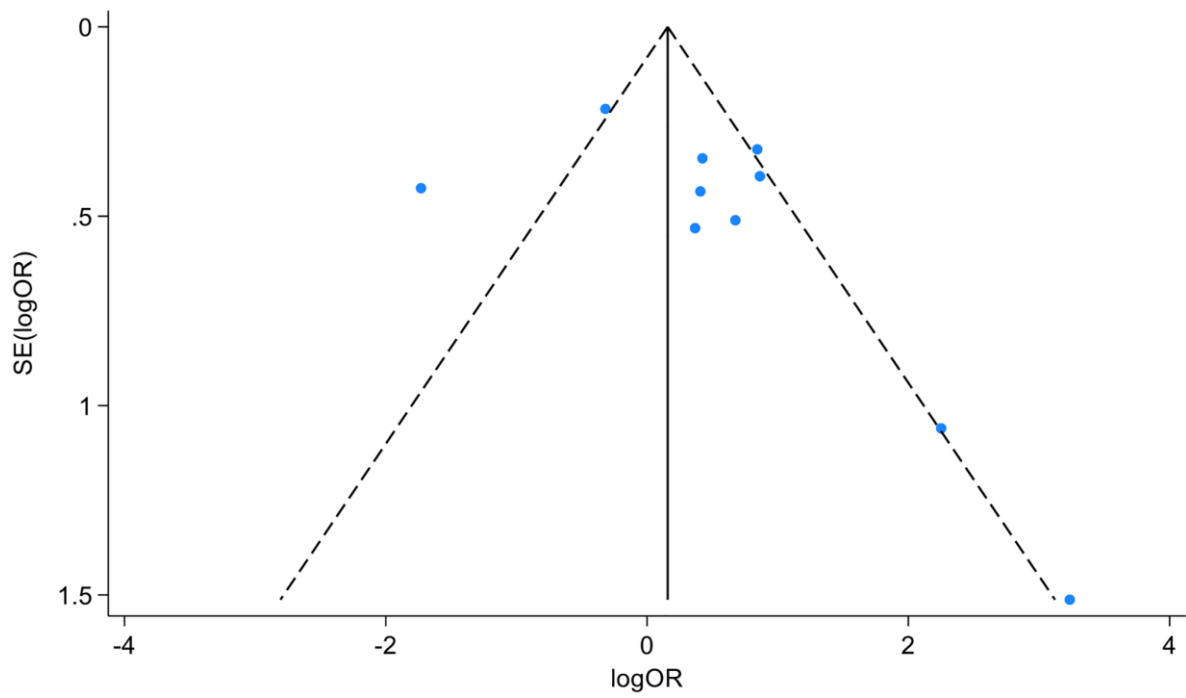

Supplementary Figure 16. Funnel plot of the odds ratio for the correlation of E-cadherin expression with lymphatic vessel invasion.

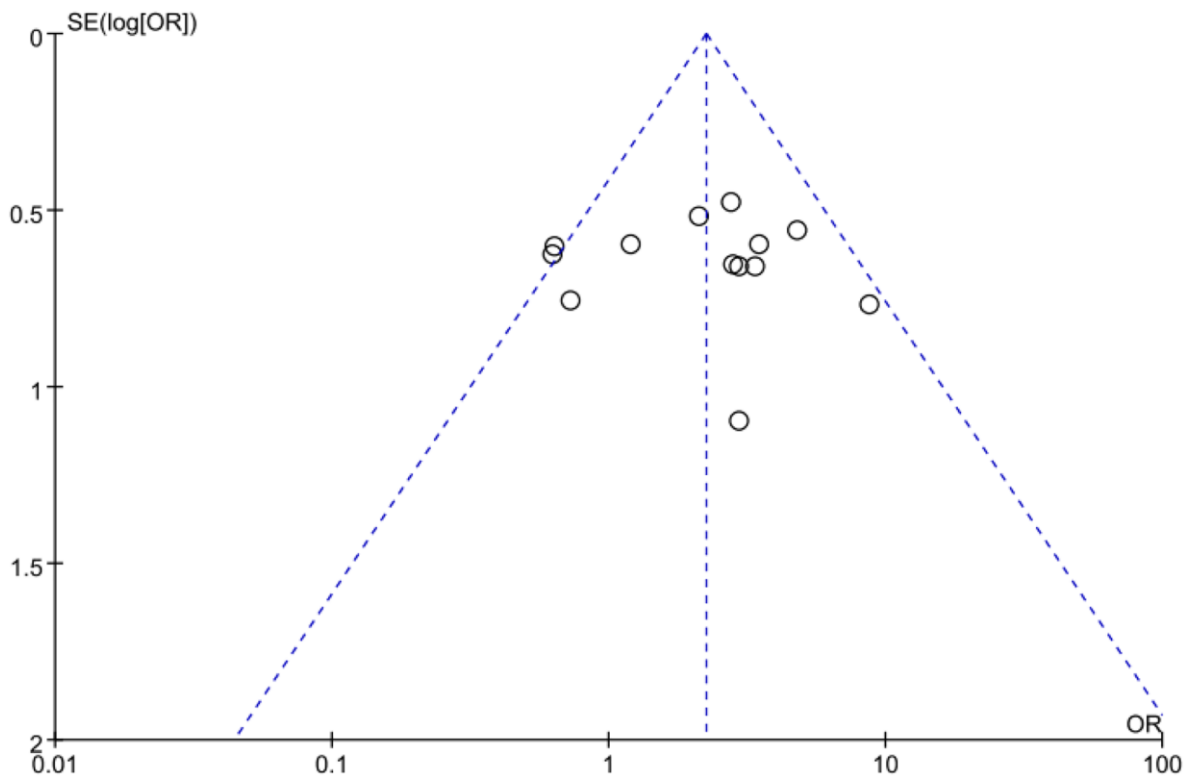

Supplementary Figure 17. Funnel plot of the odds ratio for the correlation of E-cadherin expression with distant metastasis.

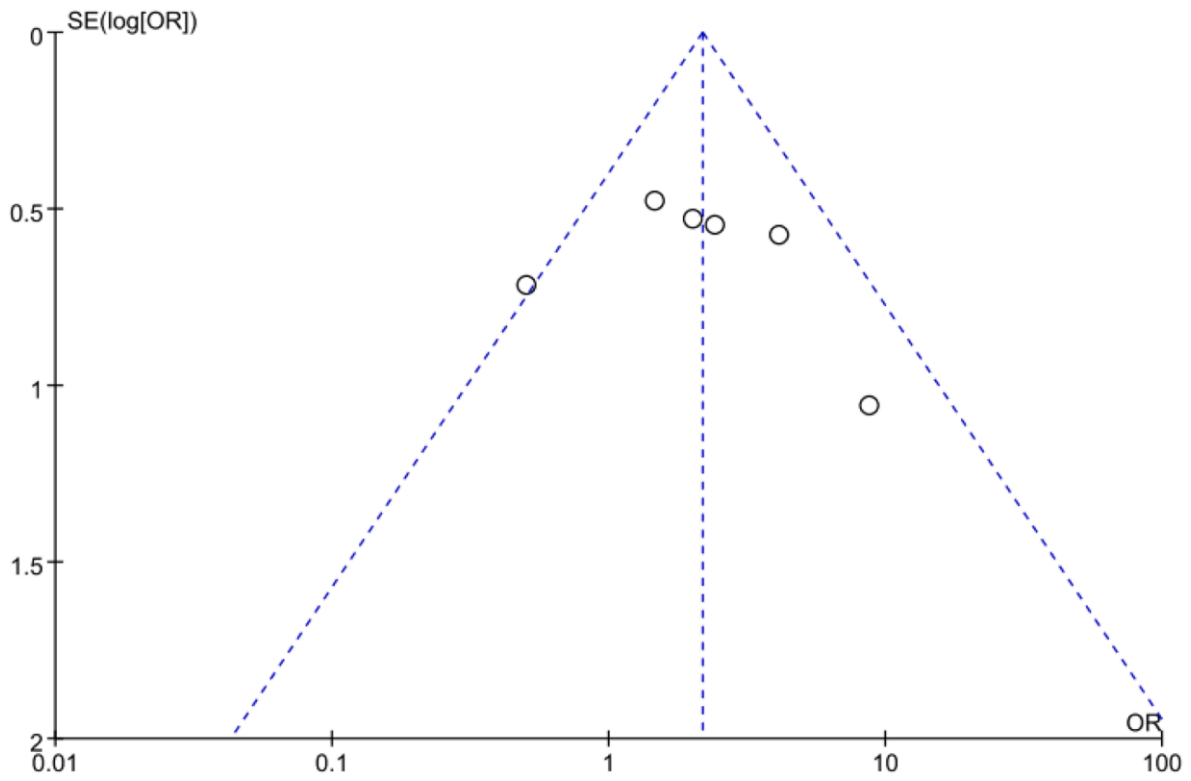

Supplementary Figure 18. Funnel plot of the odds ratio for the correlation of E-cadherin expression with peritoneal metastasis.

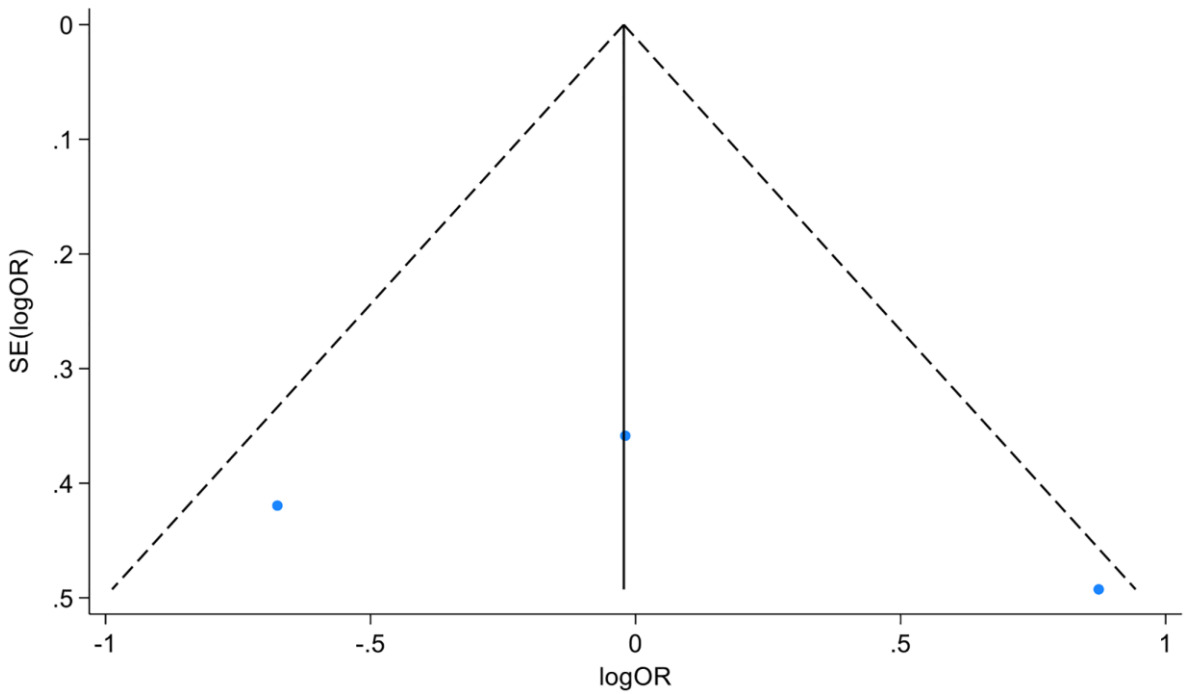

Supplementary Figure 19. Funnel plot of the odds ratio for the correlation of E-cadherin expression with perineural invasion.



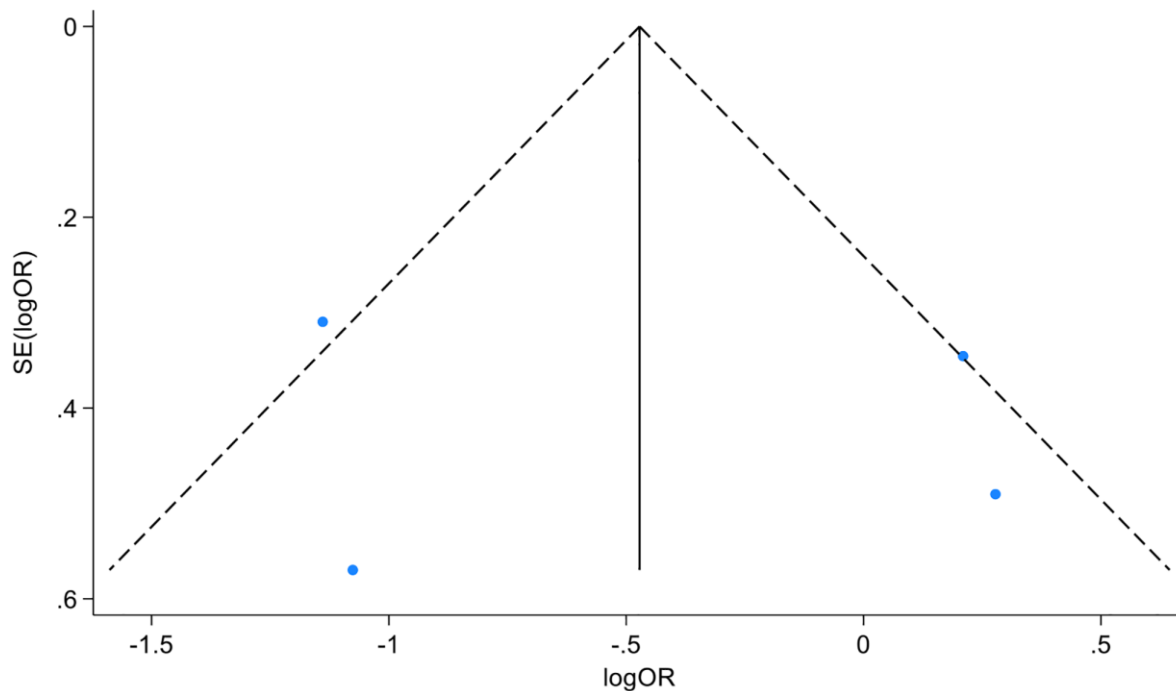

Supplementary Figure 20. Funnel plot of the odds ratio for the correlation of E-cadherin expression with HP infection.

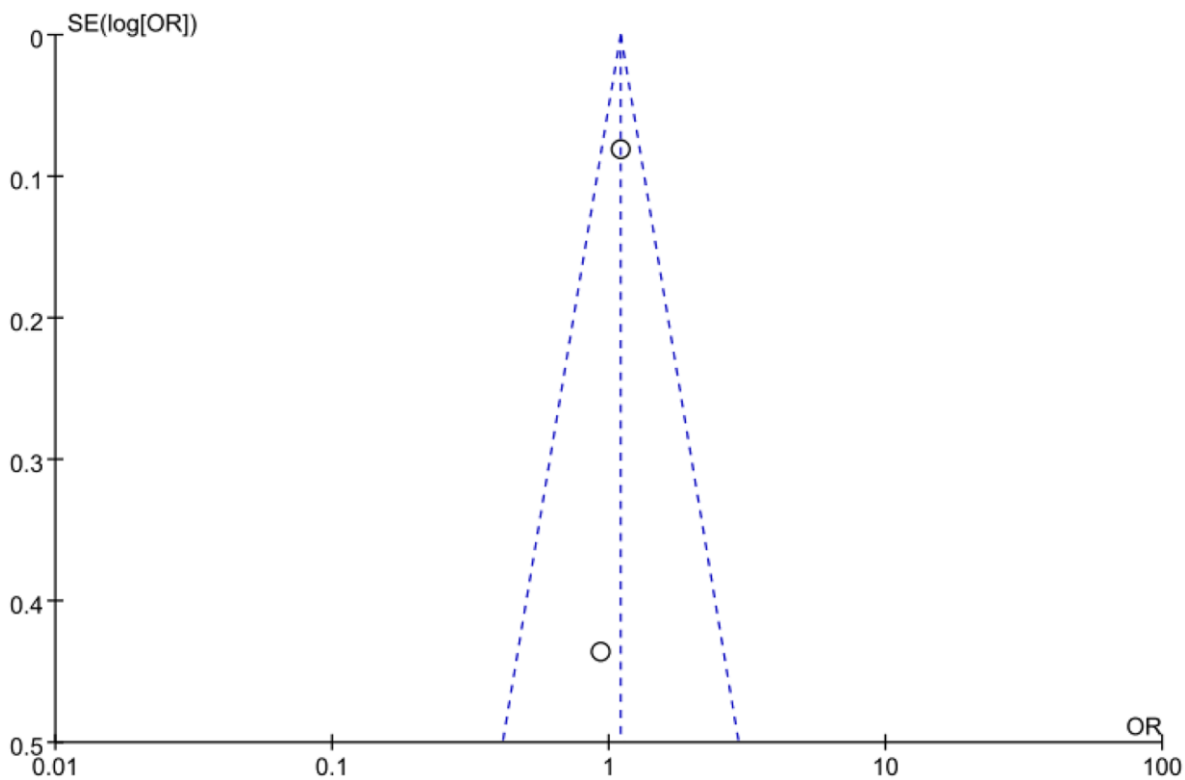

Supplementary Figure 21. Funnel plot of the odds ratio for the correlation of E-cadherin expression with alcohol consumption.

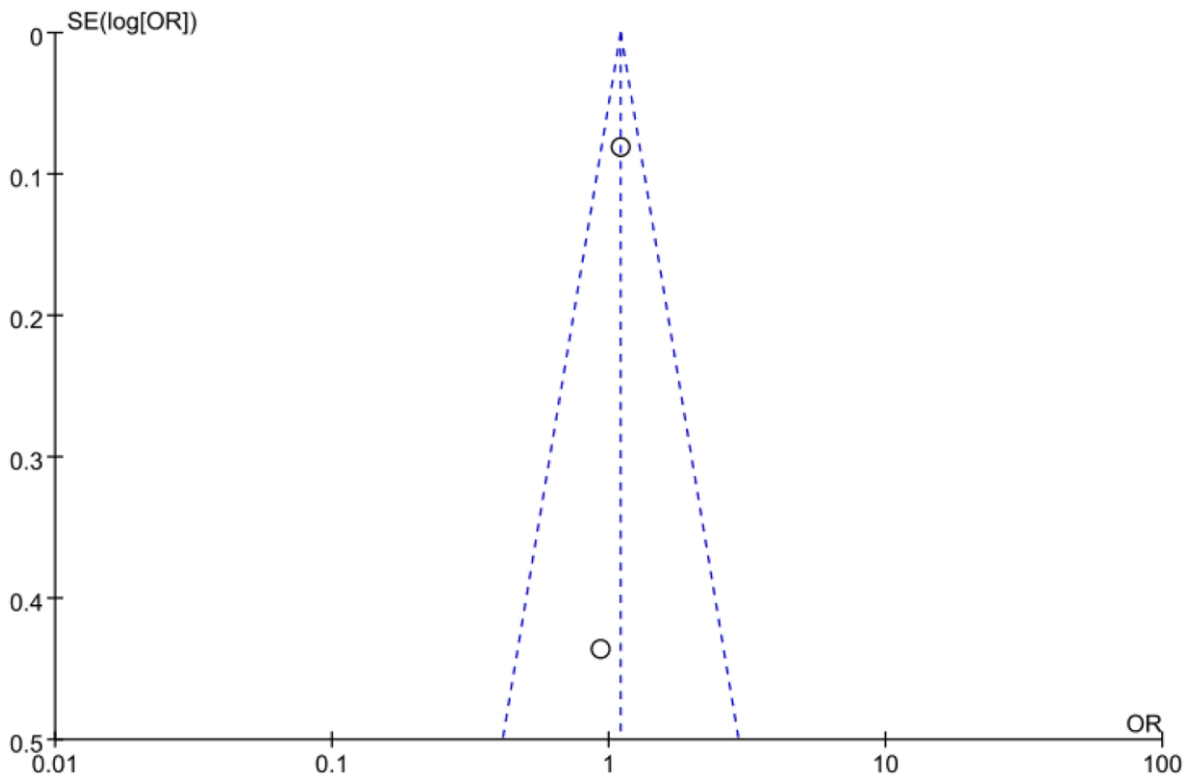

Supplementary Figure 22. Funnel plot of the odds ratio for the correlation of E-cadherin expression with smoking status.

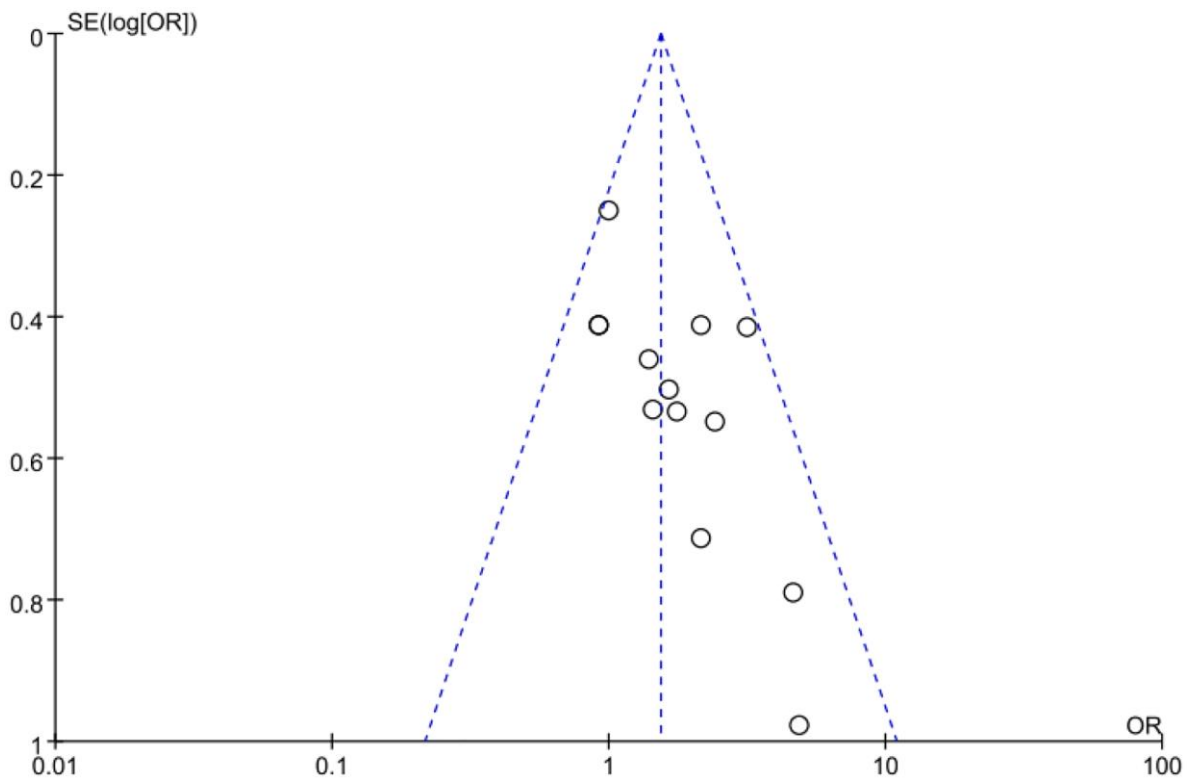

Supplementary Figure 23. Funnel plot of the odds ratio for the correlation of E-cadherin expression with vascular invasion.

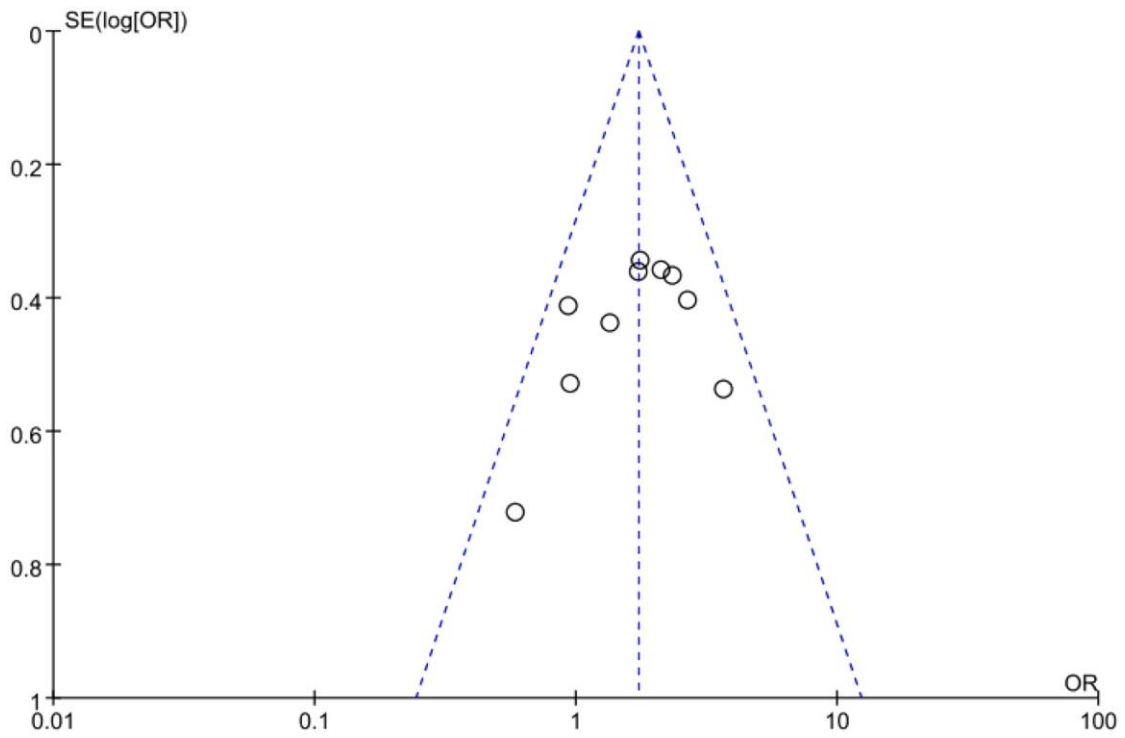

Supplementary Figure 24. Funnel plot of the odds ratio for the correlation of E-cadherin expression with tumor size (≥5 cm vs. <5 cm).

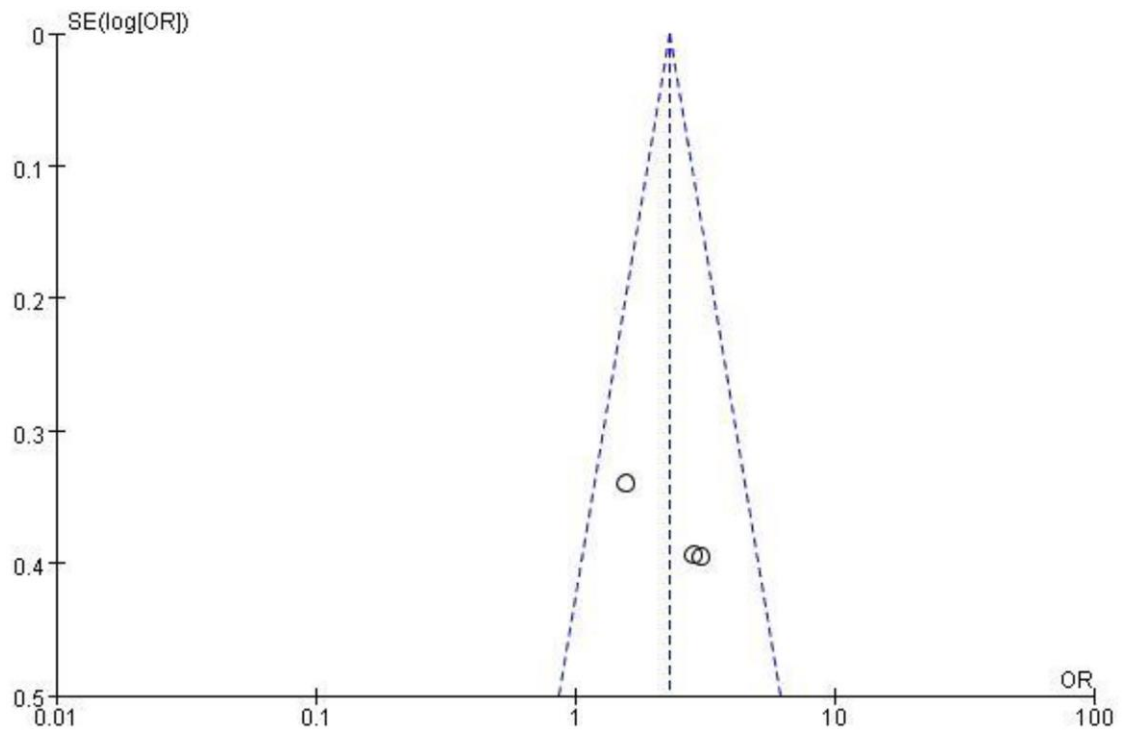

Supplementary Figure 25. Funnel plot of the odds ratio for the correlation of E-cadherin expression with tumor size (≥6 cm vs. <6 cm).

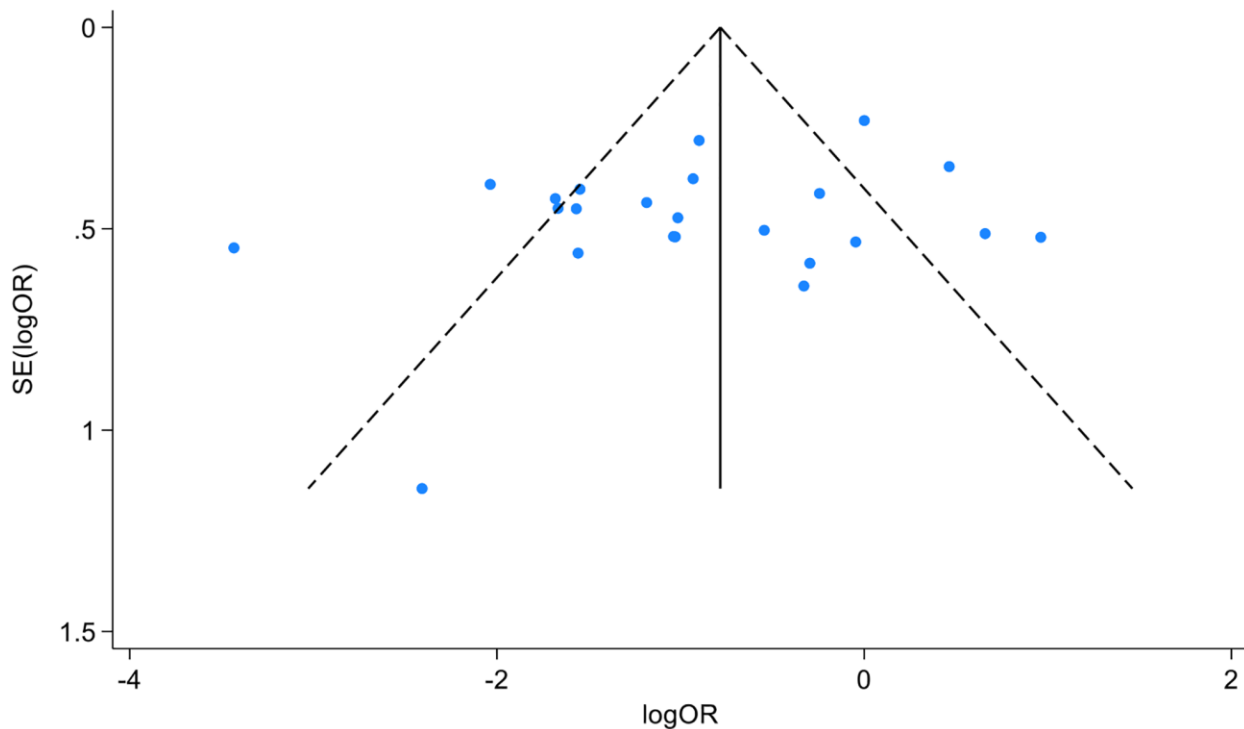

Supplementary Figure 26. Funnel plot of the odds ratio for the correlation of E-cadherin expression with TNM stage.

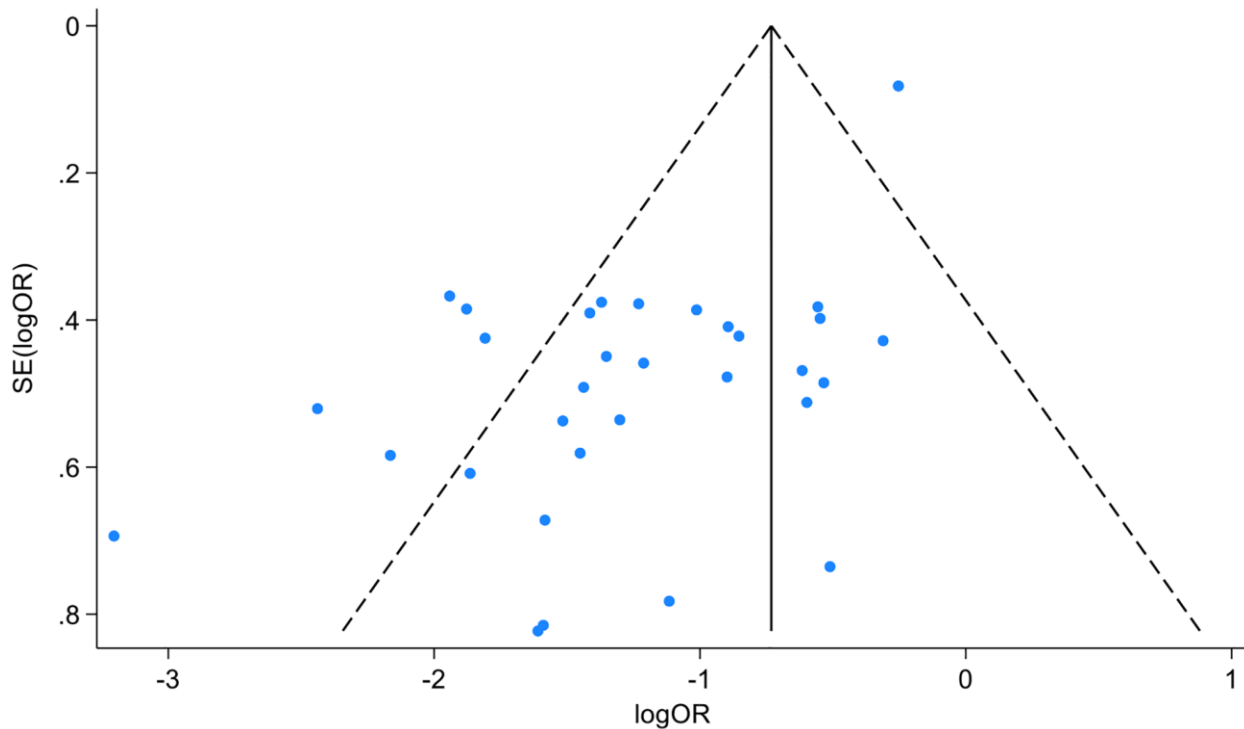

Supplementary Figure 27. Funnel plot of the odds ratio for the correlation of E-cadherin expression with differentiation grade.
